# Supplementary material for: Anti-Inflammatory Activity of Panduratin A against LPS-Induced Microglial Activation
Source: MDPI journal article supplement (doi:10.3390/biomedicines10102587), 2022-10-15
Supplement: s1 [file s1]

## Supplementary Materials

# Anti-Inflammatory Activity of Panduratin A against LPS-Induced Microglial Activation

Sopana Jamornwan, Tanida Chokpanuwat, Kwanchanok Uppakara, Sunhapas Soodvilai and Witchuda Saengsawang

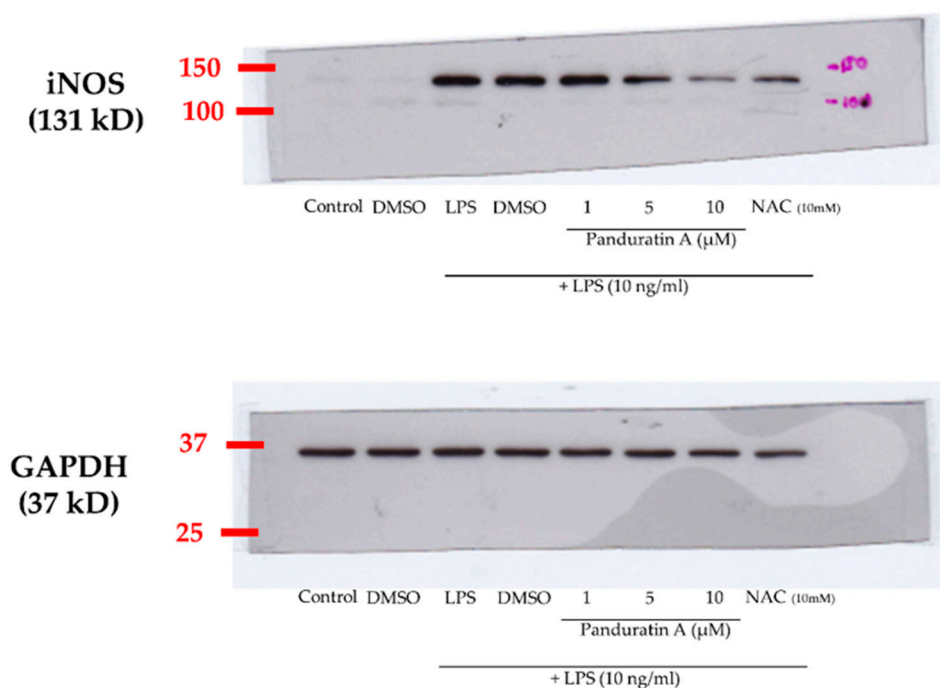

| Samples                  | Densitometry intensity |          |
|--------------------------|------------------------|----------|
|                          | iNOS                   | GAPDH    |
| Control                  | 142.435                | 6415.861 |
| DMSO                     | 98.607                 | 6131.154 |
| LPS                      | 7866.518               | 6141.326 |
| DMSO + LPS               | 7961.104               | 6108.205 |
| Panduratin A 1 μM + LPS  | 7132.569               | 5901.205 |
| Panduratin A 5 μM + LPS  | 4650.79                | 5506.376 |
| Panduratin A 10 μM + LPS | 2231.598               | 4807.962 |
| NAC 10 mM +LPS           | 2835.305               | 4336.255 |

**Figure S1.** Original images for blots (Figure 2C).

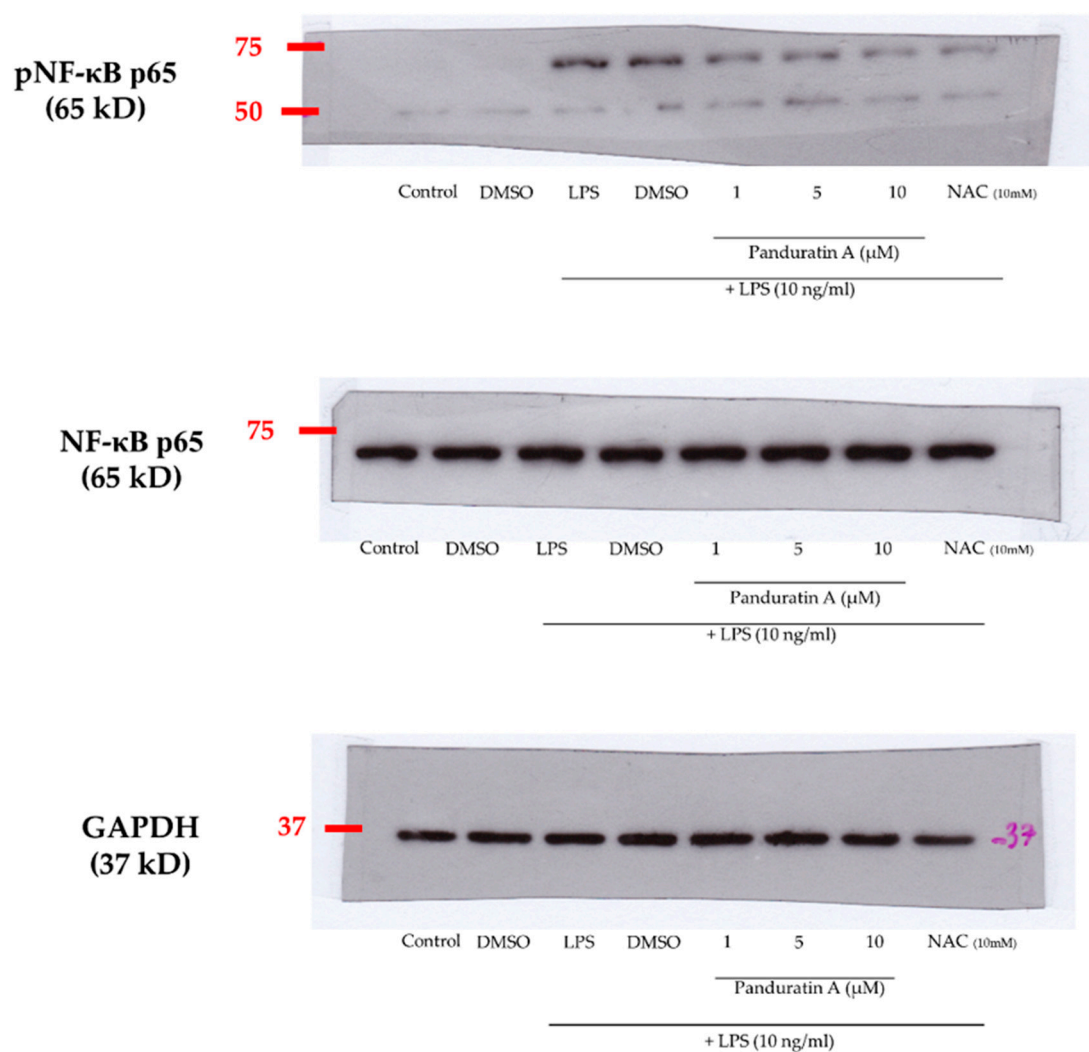

| Samples                  | Densitometry intensity |           |           |
|--------------------------|------------------------|-----------|-----------|
|                          | p-NF-κB p65            | NF-κB p65 | GAPDH     |
| Control                  | 655.648                | 32894.262 | 25177.907 |
| DMSO                     | 604.82                 | 35589.798 | 28143.664 |
| LPS                      | 21754.22               | 39029.354 | 26923.179 |
| DMSO + LPS               | 21088.927              | 38459.354 | 29166.007 |
| Panduratin A 1 μM + LPS  | 15462.572              | 39088.354 | 29961.028 |
| Panduratin A 5 μM + LPS  | 14854.451              | 39198.869 | 31702.392 |
| Panduratin A 10 μM + LPS | 8978.51                | 38391.747 | 25019.25  |
| NAC 10 mM + LPS          | 7922.61                | 35491.605 | 21746.785 |

**Figure S2.** Original images for blots (Figure 2D).
